# Supplementary material
Source: publisher figshare collection journal article supplement (https://karger.figshare.com/ndownloader/files/35920265)
Supplement: Supplementary file 1 [file 35920265]

Supplementary Fig. 1. Migration of cells into TG-PEG hydrogels was quantified using Fiji from ImageJ [27, 28]. Briefly, the area around the spheroid at day 0 (marked in yellow, labelled “1”) was selected using the freehand selection tool. Then, this initial perimeter was “brushed out” (using the selection brush tool) until all migrated cells were selected (marked in blue, which includes the initial spheroid area and is labelled “2”). The migrated area was calculated deducing the initial spheroid area at day 0 from the area at day 14. Scale bar: 200 µm.
